# Supplementary material
Source: PubMed Central journal article supplement (PMC7135990)
Supplement: supp_RA119.011280_156158_1_supp_473046_q5202s.pdf [file supp_RA119.011280_156158_1_supp_473046_q5202s.pdf]

## Supporting Information For

### The E3 ubiquitin ligase STUB1 attenuates hydrogen peroxide-induced cell senescence through promoting the ubiquitination and degradation of BMAL1

Kifayat Ullah, Suping Chen, Jiaqi Lu, Xiaohui Wang, Qing Liu, Yang Zhang, Yaqiu Long, Zhanhong Hu, Guoqiang Xu

```

1   MKGKEEKEGG ARLGAGGGSP EKSPSAQELK EQGNRLFVGR KYPEAAACYG 50
51  RAITRNPLVA VYYTNRALCY LKMQQHEQAL ADCRRALELD GQSVKAHFFL 100
101 GQCQLEMESY DEAIANLQRA YSLAKEQRLN FGDDIPSALR IAKKKRWNSI 150
151 EERRIHQESE LHSYLSRLLIA AERERELEEC QRNHEGDEDD SHVRAQQACI 200
201 EAKHDKYMAD MDELFSQVDE KRKKRDIPDY LCGKISFELM REPCITPSGI 250
251 TYDRKDIEEH LQRVGHFDPV TRSPLTQEQL IPNLAMKEVI DAFISENGWV 300
301 EDY
  
```

**Supplementary Figure S1.** Position of MS identified tryptic peptides in the amino acid sequence of STUB1. The identified peptides were underlined in the boldface.

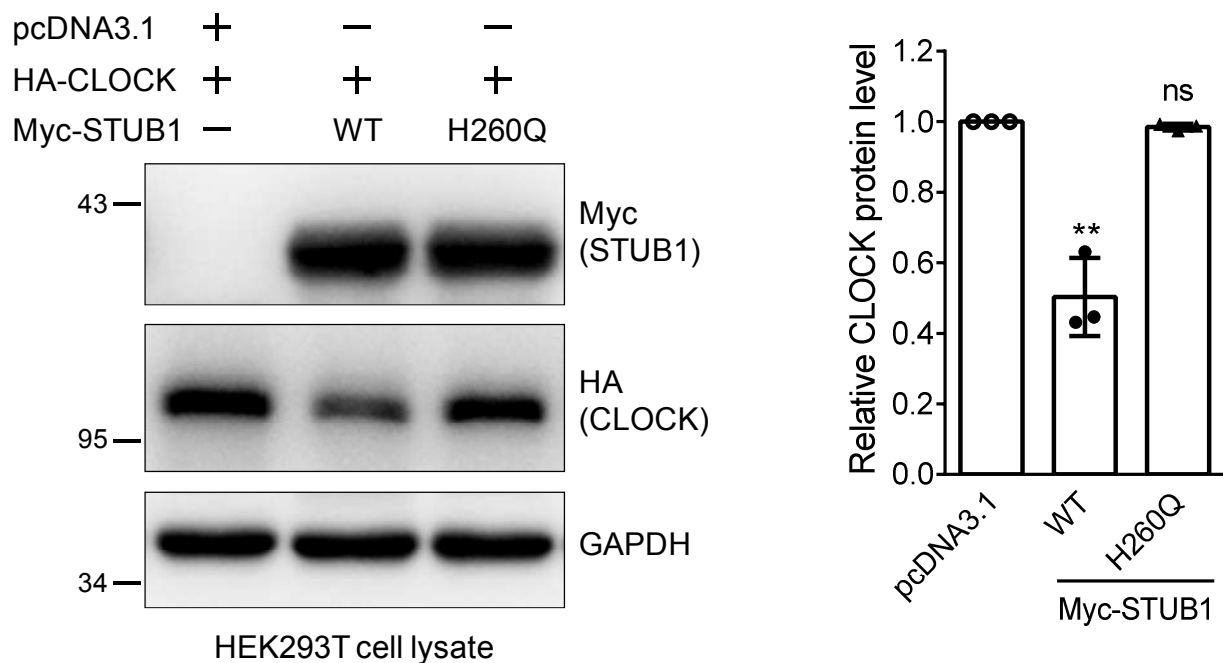

**Supplementary Figure S2.** STUB1-mediated downregulation of CLOCK requires its E3 ligase activity. HEK293T cells were transfected with HA-CLOCK plasmid and then split into three plates. The control, wild-type (WT) STUB1, or inactive H260Q STUB1 mutant plasmid was further transfected to the above cells. Cell lysates were obtained 48 h after the second transfection and immunoblotted. Student's *t*-test was used to calculate the *P*-value for the data (means±SDs) from three biological replicates. \*\*:  $P < 0.01$ ; ns: not significant.

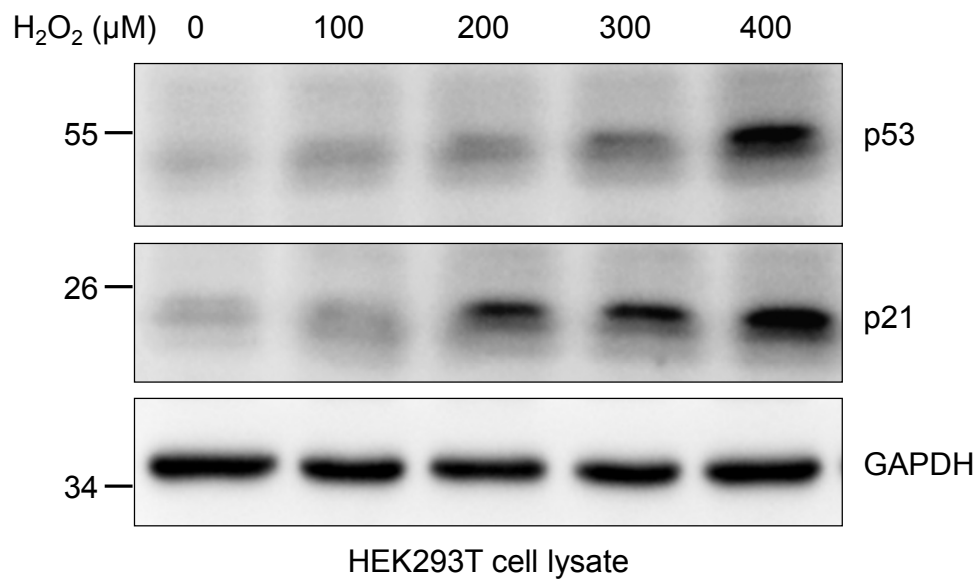

**Supplementary Figure S3.** H<sub>2</sub>O<sub>2</sub> induces senescence in HEK293T cells. HEK293T cells were treated with different concentrations of H<sub>2</sub>O<sub>2</sub> for 24 h and the resulting cell lysates were immunoblotted with the indicated antibodies.
